# Supplementary material
Source: HighWire-hosted journal article supplement (https://heart.bmj.com/content/105/18/1408)
Supplement: inline-supplementary-material-1 [file inline-supplementary-material-1.docx]

**Appendix 1: British Columbia Premature Ventricular Complex (PVC) Registry Documents**

1. **Care Maps for Registry Populations**
2. Normal left ventricular function and no treatment indicated (absence of severe symptoms)

|  | **Initial Visit** | **FU 1  (3 Mos)** | **FU2  (6 Mos)** | **FU3  (12 Mos)** | **FU4  (18 Mos)** | **FU5  (24 Mos)** | **FU6+  (q12M)** |
| --- | --- | --- | --- | --- | --- | --- | --- |
| **Notes:** |  | Discuss test results |  |  |  |  |  |
| **Clinic/Telehealth Visit** | X |  | X | X | X | X | X |
| **ECG** | X |  | X | X | X | X | X |
| **Holter** | X (within 3 months) |  | X | X | X | X | X |
| **Exercise Treadmill Test** | X |  |  |  |  |  |  |
| **Bloodwork** | X |  |  |  |  |  |  |
| **Echocardiogram** | X |  |  | X |  | X | X |
| **Cardiac MRI** | X |  |  |  |  |  |  |
| **Obtain prior investigations** | X |  |  |  |  |  |  |

1. Normal left ventricular function and treatment indicated (antiarrhythmic therapy [AAD] or catheter ablation)

|  | **Treatment initiation** | **FURX1 (1 Mo)** | **FURX2 (6 Mos)** | **FURX3 (12 Mos)** | **FURX4 (18 Mos)** | **FURX5 (24 Mos)** | **FURX6+ (q12M)** |
| --- | --- | --- | --- | --- | --- | --- | --- |
| **Notes:** |  | Holter only |  |  |  |  | If required **** |
| **Clinic/Telehealth Visit** | X |  | X | X | X | X | X |
| **ECG** | X** |  | X | X | X | X | X |
| **Holter** | X (within 3 months) | X | X | X | X | X | X |
| **Bloodwork** |  |  |  | If required *** |  | If required *** |  |
| **Echocardiogram** |  |  |  | X |  | X | X |

Notes: **If initiating AAD then repeat ECG in 5-7 days); ***If required for AAD monitoring; ****If <1% residual PVCs after ablation at 24 months then no further follow up required
